# Supplementary material
Source: publisher figshare collection journal article supplement (https://acs.figshare.com/ndownloader/files/5894391)
Supplement: Supplementary file 1 [file 5894391]

# om980732o.cif

#1. SUBMISSION DETAILS

_publ_contact_author
       Herbert W. Roesky
       Institut f\"ur Anorganische Chemie
       Universit\"at G\"ottingen
       Tammannstr. 4
       37077 G\"ottingen
       Germany

'Please consider this CIF file submission for inclusion in the
database. The paper has been submitted to Organometallics
with the title " First Structurally Characterized Organometallic Chloro 
Oxo-Peroxo Compounds of Molybdenum and Tungsten".'

_publ_contact_author_phone   '49 551 39 3001'
_publ_contact_author_fax     '49 551 39 3373'
_publ_contact_author_e-mail  ?

_publ_request_journal        'Organometallics'


;
;
#2. AUTHOR LIST

loop_

_publ_author_name
_publ_author_adress


'Debashis Chakraborty, Manish Bhattacharjee, Ralph Kr\"atzner, Rolf
Siefken, Herbert W. Roesky, Isabel Us\'on, Hans-Georg Schmidt.'
;
     Institut f\"ur Anorganische Chemie
     Universit\"at G\"ottingen
     Tammannstr. 4
     37077 G\"ttingen
     Germany


data_1
 
_audit_creation_method            SHELXL-97
_chemical_name_systematic
;
 ?
;
_chemical_name_common             ?
_chemical_melting_point           343
_chemical_formula_moiety          ?
_chemical_formula_sum
 'C10 H15 Cl Mo O3'
_chemical_formula_weight          314.61
 
loop_
 _atom_type_symbol
 _atom_type_description
 _atom_type_scat_dispersion_real
 _atom_type_scat_dispersion_imag
 _atom_type_scat_source
 'C'  'C'   0.0033   0.0016
 'International Tables Vol C Tables 4.2.6.8 and 6.1.1.4'
 'H'  'H'   0.0000   0.0000
 'International Tables Vol C Tables 4.2.6.8 and 6.1.1.4'
 'O'  'O'   0.0106   0.0060
 'International Tables Vol C Tables 4.2.6.8 and 6.1.1.4'
 'Cl'  'Cl'   0.1484   0.1585
 'International Tables Vol C Tables 4.2.6.8 and 6.1.1.4'
 'Mo'  'Mo'  -1.6832   0.6857
 'International Tables Vol C Tables 4.2.6.8 and 6.1.1.4'
 
_symmetry_cell_setting            'triclinic'
_symmetry_space_group_name_H-M    'p-1'
 
loop_
 _symmetry_equiv_pos_as_xyz
 'x, y, z'
 '-x, -y, -z'
 
_cell_length_a                    6.3910(10)
_cell_length_b                    8.565(2)
_cell_length_c                    10.939(2)
_cell_angle_alpha                 84.83(3)
_cell_angle_beta                  86.79(3)
_cell_angle_gamma                 89.04(3)
_cell_volume                      595.4(2)
_cell_formula_units_Z             2
_cell_measurement_temperature     133(2)
_cell_measurement_reflns_used     3588
_cell_measurement_theta_min       1.9
_cell_measurement_theta_max       27.54
 
_exptl_crystal_description        'blocks'
_exptl_crystal_colour             'yellow'
_exptl_crystal_size_max           0.20
_exptl_crystal_size_mid           0.10
_exptl_crystal_size_min           0.10
_exptl_crystal_density_meas       'not measured'
_exptl_crystal_density_diffrn     1.755
_exptl_crystal_density_method     'not measured'
_exptl_crystal_F_000              316
_exptl_absorpt_coefficient_mu     1.310
_exptl_absorpt_correction_type    multi-scan
_exptl_absorpt_correction_T_min   0.7796
_exptl_absorpt_correction_T_max   0.8802
_exptl_absorpt_process_details    ?
 
_exptl_special_details
;
'Intensities were measured with a Siemens CCD area detector'
;
 
_diffrn_ambient_temperature       133(2)
_diffrn_radiation_wavelength      0.71073
_diffrn_radiation_type            MoK\a
_diffrn_radiation_source          'fine-focus sealed tube'
_diffrn_radiation_monochromator   graphite
_diffrn_measurement_device_type   'Stoe-Siemens-Huber four circle diffractometer
_diffrn_measurement_method        'phi and omega scan'
_diffrn_detector_area_resol_mean  '8.192 pixels/mm'
_diffrn_standards_number          ?
_diffrn_standards_interval_count  ?
_diffrn_standards_interval_time   ?
_diffrn_standards_decay_%         ?
_diffrn_reflns_number             8349
_diffrn_reflns_av_R_equivalents   0.0474
_diffrn_reflns_av_sigmaI/netI     0.0505
_diffrn_reflns_limit_h_min        -7
_diffrn_reflns_limit_h_max        7
_diffrn_reflns_limit_k_min        -10
_diffrn_reflns_limit_k_max        10
_diffrn_reflns_limit_l_min        0
_diffrn_reflns_limit_l_max        13
_diffrn_reflns_theta_min          1.87
_diffrn_reflns_theta_max          26.00
_reflns_number_total              2329
_reflns_number_gt                 1769
_reflns_threshold_expression      >2sigma(I)
 
_computing_data_collection        'Siemens SMART (V. 4.202, Siemens 1996)'
_computing_cell_refinement        'Siemens SAINT (V. 5.00, Siemens 1998)'
_computing_data_reduction         'Siemens SAINT (V. 5.00, Siemens 1998)'
_computing_structure_solution     'SHELXS-97 (Sheldrick, 1990)'
_computing_structure_refinement   'SHELXL-97 (Sheldrick, 1997)'
_computing_molecular_graphics     'Bruker AXS SHELXTL (V. 5.10)'
_computing_publication_material   'SHELXL-97 (Sheldrick, 1997)'
 
_refine_special_details
;
 Refinement of F^2^ against ALL reflections.  The weighted R-factor wR and
 goodness of fit S are based on F^2^, conventional R-factors R are based
 on F, with F set to zero for negative F^2^. The threshold expression of
 F^2^ > 2sigma(F^2^) is used only for calculating R-factors(gt) etc. and is
 not relevant to the choice of reflections for refinement.  R-factors based
 on F^2^ are statistically about twice as large as those based on F, and R-
 factors based on ALL data will be even larger.
;
 
_refine_ls_structure_factor_coef  Fsqd
_refine_ls_matrix_type            full
_refine_ls_weighting_scheme       calc
_refine_ls_weighting_details
 'calc w=1/[\s^2^(Fo^2^)+(0.0573P)^2^+0.0000P] where P=(Fo^2^+2Fc^2^)/3'
_atom_sites_solution_primary      direct
_atom_sites_solution_secondary    difmap
_atom_sites_solution_hydrogens    geom
_refine_ls_hydrogen_treatment     mixed
_refine_ls_extinction_method      none
_refine_ls_extinction_coef        ?
_refine_ls_number_reflns          2329
_refine_ls_number_parameters      168
_refine_ls_number_restraints      220
_refine_ls_R_factor_all           0.0586
_refine_ls_R_factor_gt            0.0379
_refine_ls_wR_factor_ref          0.0928
_refine_ls_wR_factor_gt           0.0873
_refine_ls_goodness_of_fit_ref    0.980
_refine_ls_restrained_S_all       0.950
_refine_ls_shift/su_max           0.000
_refine_ls_shift/su_mean          0.000
 
loop_
 _atom_site_label
 _atom_site_type_symbol
 _atom_site_fract_x
 _atom_site_fract_y
 _atom_site_fract_z
 _atom_site_U_iso_or_equiv
 _atom_site_adp_type
 _atom_site_occupancy
 _atom_site_symmetry_multiplicity
 _atom_site_calc_flag
 _atom_site_refinement_flags
 _atom_site_disorder_assembly
 _atom_site_disorder_group
Mo1 Mo 0.57036(6) 0.72256(5) 0.72149(3) 0.03491(16) Uani 1 1 d DU . .
Cl1' Cl 0.7183(5) 0.4901(4) 0.7495(3) 0.0249(6) Uani 0.46 1 d PDU A 1
O2' O 0.7832(11) 0.7955(9) 0.8336(7) 0.0348(16) Uani 0.46 1 d PDU A 1
O3' O 0.6313(13) 0.9217(9) 0.8150(8) 0.033(2) Uani 0.46 1 d PDU A 1
Cl1 Cl 0.7127(5) 0.8831(4) 0.8388(3) 0.0382(7) Uani 0.54 1 d PDU A 2
O2 O 0.7902(9) 0.5632(7) 0.7812(5) 0.0335(13) Uani 0.54 1 d PDU A 2
O3 O 0.6414(11) 0.4811(7) 0.7164(7) 0.0266(16) Uani 0.54 1 d PDU A 2
O1 O 0.6505(4) 0.7892(3) 0.5773(2) 0.0296(6) Uani 1 1 d U A .
C1 C 0.2501(6) 0.7539(4) 0.8496(3) 0.0214(7) Uani 1 1 d U A .
C2 C 0.2508(5) 0.6012(4) 0.8170(3) 0.0215(8) Uani 1 1 d U A .
C3 C 0.2489(6) 0.6067(4) 0.6836(3) 0.0206(7) Uani 1 1 d U A .
C4 C 0.2285(6) 0.7661(4) 0.6370(3) 0.0213(8) Uani 1 1 d U A .
C5 C 0.2446(6) 0.8586(4) 0.7372(3) 0.0230(8) Uani 1 1 d U A .
C11 C 0.2410(7) 0.8087(5) 0.9756(3) 0.0330(9) Uani 1 1 d U . .
H11A H 0.1023 0.8544 0.9937 0.049 Uiso 1 1 calc R A .
H11B H 0.3484 0.8880 0.9800 0.049 Uiso 1 1 calc R . .
H11C H 0.2662 0.7196 1.0360 0.049 Uiso 1 1 calc R . .
C12 C 0.2489(6) 0.4521(4) 0.8998(3) 0.0300(9) Uani 1 1 d U . .
H12A H 0.2774 0.4752 0.9834 0.045 Uiso 1 1 calc R A .
H12B H 0.3569 0.3802 0.8698 0.045 Uiso 1 1 calc R . .
H12C H 0.1111 0.4034 0.9004 0.045 Uiso 1 1 calc R . .
C13 C 0.2373(7) 0.4670(4) 0.6130(3) 0.0303(9) Uani 1 1 d U . .
H13A H 0.0966 0.4227 0.6253 0.045 Uiso 1 1 calc R A .
H13B H 0.3408 0.3883 0.6417 0.045 Uiso 1 1 calc R . .
H13C H 0.2670 0.4980 0.5253 0.045 Uiso 1 1 calc R . .
C14 C 0.2090(6) 0.8245(4) 0.5056(3) 0.0288(9) Uani 1 1 d U . .
H14A H 0.2821 0.7520 0.4529 0.043 Uiso 1 1 calc R A .
H14B H 0.2715 0.9286 0.4901 0.043 Uiso 1 1 calc R . .
H14C H 0.0605 0.8312 0.4874 0.043 Uiso 1 1 calc R . .
C15 C 0.2272(8) 1.0331(4) 0.7334(4) 0.0381(11) Uani 1 1 d U . .
H15A H 0.2730 1.0795 0.6512 0.057 Uiso 1 1 calc R A .
H15B H 0.3162 1.0708 0.7944 0.057 Uiso 1 1 calc R . .
H15C H 0.0812 1.0636 0.7519 0.057 Uiso 1 1 calc R . .
 
loop_
 _atom_site_aniso_label
 _atom_site_aniso_U_11
 _atom_site_aniso_U_22
 _atom_site_aniso_U_33
 _atom_site_aniso_U_23
 _atom_site_aniso_U_13
 _atom_site_aniso_U_12
Mo1 0.0195(2) 0.0592(3) 0.0230(2) 0.01330(16) 0.00061(13) -0.00482(16)
Cl1' 0.0208(17) 0.0300(15) 0.0228(17) 0.0028(11) -0.0020(12) 0.0051(13)
O2' 0.023(3) 0.043(4) 0.040(4) -0.006(4) -0.003(3) -0.002(3)
O3' 0.021(5) 0.039(4) 0.041(5) -0.005(3) -0.008(4) -0.002(3)
Cl1 0.0275(18) 0.0467(18) 0.0437(16) -0.0208(16) -0.0014(13) -0.0091(13)
O2 0.025(3) 0.045(4) 0.030(3) 0.001(3) -0.003(2) 0.003(3)
O3 0.024(4) 0.027(3) 0.028(4) 0.002(2) -0.004(3) -0.001(3)
O1 0.0272(15) 0.0311(15) 0.0283(14) 0.0063(11) 0.0044(11) -0.0062(12)
C1 0.0195(18) 0.0226(18) 0.0211(17) 0.0025(14) 0.0003(14) -0.0012(15)
C2 0.0147(17) 0.0279(19) 0.0203(18) 0.0066(14) 0.0012(14) -0.0018(14)
C3 0.0168(17) 0.0245(18) 0.0202(17) -0.0004(14) -0.0002(14) -0.0021(14)
C4 0.0185(18) 0.0233(18) 0.0214(18) 0.0019(14) -0.0001(14) -0.0011(15)
C5 0.0237(18) 0.0227(18) 0.0223(18) -0.0003(14) -0.0003(15) -0.0023(15)
C11 0.032(2) 0.041(2) 0.026(2) -0.0062(17) 0.0028(18) -0.0009(19)
C12 0.031(2) 0.031(2) 0.025(2) 0.0083(16) 0.0039(17) -0.0025(18)
C13 0.039(2) 0.023(2) 0.028(2) 0.0016(16) -0.0015(18) -0.0005(18)
C14 0.035(2) 0.027(2) 0.023(2) 0.0054(16) -0.0029(17) 0.0005(18)
C15 0.056(3) 0.024(2) 0.035(2) -0.0051(17) 0.000(2) -0.001(2)
 
_geom_special_details
;
 All esds (except the esd in the dihedral angle between two l.s. planes)
 are estimated using the full covariance matrix.  The cell esds are taken
 into account individually in the estimation of esds in distances, angles
 and torsion angles; correlations between esds in cell parameters are only
 used when they are defined by crystal symmetry.  An approximate (isotropic)
 treatment of cell esds is used for estimating esds involving l.s. planes.
;
 
loop_
 _geom_bond_atom_site_label_1
 _geom_bond_atom_site_label_2
 _geom_bond_distance
 _geom_bond_site_symmetry_2
 _geom_bond_publ_flag
Mo1 O1 1.683(3) . ?
Mo1 O2' 2.024(7) . ?
Mo1 O2 2.035(5) . ?
Mo1 O3 2.115(6) . ?
Mo1 O3' 2.118(7) . ?
Mo1 Cl1' 2.193(3) . ?
Mo1 Cl1 2.204(3) . ?
Mo1 C3 2.370(4) . ?
Mo1 C5 2.374(4) . ?
Mo1 C4 2.429(4) . ?
Mo1 C1 2.440(4) . ?
Mo1 C2 2.445(3) . ?
O2' O3' 1.448(8) . ?
O2 O3 1.445(7) . ?
C1 C2 1.386(5) . ?
C1 C5 1.456(5) . ?
C1 C11 1.494(5) . ?
C2 C3 1.457(5) . ?
C2 C12 1.497(5) . ?
C3 C4 1.420(5) . ?
C3 C13 1.486(5) . ?
C4 C5 1.418(5) . ?
C4 C14 1.490(5) . ?
C5 C15 1.494(5) . ?
 
loop_
 _geom_angle_atom_site_label_1
 _geom_angle_atom_site_label_2
 _geom_angle_atom_site_label_3
 _geom_angle
 _geom_angle_site_symmetry_1
 _geom_angle_site_symmetry_3
 _geom_angle_publ_flag
O1 Mo1 O2' 106.6(2) . . ?
O1 Mo1 O2 106.37(19) . . ?
O2' Mo1 O2 62.9(3) . . ?
O1 Mo1 O3 100.1(2) . . ?
O2' Mo1 O3 103.4(3) . . ?
O2 Mo1 O3 40.7(2) . . ?
O1 Mo1 O3' 99.9(3) . . ?
O2' Mo1 O3' 40.8(2) . . ?
O2 Mo1 O3' 103.6(3) . . ?
O3 Mo1 O3' 143.1(3) . . ?
O1 Mo1 Cl1' 104.42(13) . . ?
O2' Mo1 Cl1' 86.6(2) . . ?
O2 Mo1 Cl1' 23.89(16) . . ?
O3 Mo1 Cl1' 16.86(14) . . ?
O3' Mo1 Cl1' 126.7(2) . . ?
O1 Mo1 Cl1 104.43(13) . . ?
O2' Mo1 Cl1 23.33(18) . . ?
O2 Mo1 Cl1 86.1(2) . . ?
O3 Mo1 Cl1 126.0(2) . . ?
O3' Mo1 Cl1 17.54(16) . . ?
Cl1' Mo1 Cl1 109.35(14) . . ?
O1 Mo1 C3 100.17(13) . . ?
O2' Mo1 C3 153.0(2) . . ?
O2 Mo1 C3 113.1(2) . . ?
O3 Mo1 C3 75.1(2) . . ?
O3' Mo1 C3 130.6(3) . . ?
Cl1' Mo1 C3 90.57(13) . . ?
Cl1 Mo1 C3 142.87(13) . . ?
O1 Mo1 C5 99.38(13) . . ?
O2' Mo1 C5 113.0(2) . . ?
O2 Mo1 C5 154.01(18) . . ?
O3 Mo1 C5 131.2(2) . . ?
O3' Mo1 C5 74.8(2) . . ?
Cl1' Mo1 C5 143.25(13) . . ?
Cl1 Mo1 C5 90.95(13) . . ?
C3 Mo1 C5 57.60(13) . . ?
O1 Mo1 C4 81.59(13) . . ?
O2' Mo1 C4 146.8(2) . . ?
O2 Mo1 C4 146.9(2) . . ?
O3 Mo1 C4 106.7(2) . . ?
O3' Mo1 C4 106.6(2) . . ?
Cl1' Mo1 C4 123.26(13) . . ?
Cl1 Mo1 C4 123.83(13) . . ?
C3 Mo1 C4 34.38(12) . . ?
C5 Mo1 C4 34.32(13) . . ?
O1 Mo1 C1 134.30(13) . . ?
O2' Mo1 C1 99.8(2) . . ?
O2 Mo1 C1 118.83(18) . . ?
O3 Mo1 C1 109.3(2) . . ?
O3' Mo1 C1 76.7(3) . . ?
Cl1' Mo1 C1 113.96(12) . . ?
Cl1 Mo1 C1 85.83(12) . . ?
C3 Mo1 C1 57.19(13) . . ?
C5 Mo1 C1 35.18(11) . . ?
C4 Mo1 C1 57.17(12) . . ?
O1 Mo1 C2 134.89(13) . . ?
O2' Mo1 C2 117.8(2) . . ?
O2 Mo1 C2 100.75(19) . . ?
O3 Mo1 C2 78.0(2) . . ?
O3' Mo1 C2 107.9(3) . . ?
Cl1' Mo1 C2 86.65(12) . . ?
Cl1 Mo1 C2 112.87(12) . . ?
C3 Mo1 C2 35.18(12) . . ?
C5 Mo1 C2 56.90(12) . . ?
C4 Mo1 C2 57.02(11) . . ?
C1 Mo1 C2 32.97(12) . . ?
O3' O2' Mo1 73.1(4) . . ?
O2' O3' Mo1 66.1(4) . . ?
O3 O2 Mo1 72.6(3) . . ?
O2 O3 Mo1 66.7(3) . . ?
C2 C1 C5 107.8(3) . . ?
C2 C1 C11 128.2(3) . . ?
C5 C1 C11 123.9(3) . . ?
C2 C1 Mo1 73.7(2) . . ?
C5 C1 Mo1 69.9(2) . . ?
C11 C1 Mo1 125.0(3) . . ?
C1 C2 C3 108.2(3) . . ?
C1 C2 C12 128.2(3) . . ?
C3 C2 C12 123.7(3) . . ?
C1 C2 Mo1 73.3(2) . . ?
C3 C2 Mo1 69.57(19) . . ?
C12 C2 Mo1 123.7(3) . . ?
C4 C3 C2 108.0(3) . . ?
C4 C3 C13 126.7(3) . . ?
C2 C3 C13 124.7(3) . . ?
C4 C3 Mo1 75.1(2) . . ?
C2 C3 Mo1 75.2(2) . . ?
C13 C3 Mo1 122.8(3) . . ?
C5 C4 C3 107.3(3) . . ?
C5 C4 C14 126.7(3) . . ?
C3 C4 C14 125.9(3) . . ?
C5 C4 Mo1 70.7(2) . . ?
C3 C4 Mo1 70.5(2) . . ?
C14 C4 Mo1 120.9(3) . . ?
C4 C5 C1 108.3(3) . . ?
C4 C5 C15 126.7(3) . . ?
C1 C5 C15 124.5(3) . . ?
C4 C5 Mo1 75.0(2) . . ?
C1 C5 Mo1 74.9(2) . . ?
C15 C5 Mo1 123.0(3) . . ?
 
_diffrn_measured_fraction_theta_max    0.998
_diffrn_reflns_theta_full              26.00
_diffrn_measured_fraction_theta_full   0.998
_refine_diff_density_max    0.916
_refine_diff_density_min   -1.495
_refine_diff_density_rms    0.107
 
 

data_2
 
_audit_creation_method            SHELXL-97
_chemical_name_systematic
;
 ?
;
_chemical_name_common             ?
_chemical_melting_point           350
_chemical_formula_moiety          ?
_chemical_formula_sum
 'C10 H15 Cl O3 W'
_chemical_formula_weight          402.52
 
loop_
 _atom_type_symbol
 _atom_type_description
 _atom_type_scat_dispersion_real
 _atom_type_scat_dispersion_imag
 _atom_type_scat_source
 'C'  'C'   0.0033   0.0016
 'International Tables Vol C Tables 4.2.6.8 and 6.1.1.4'
 'H'  'H'   0.0000   0.0000
 'International Tables Vol C Tables 4.2.6.8 and 6.1.1.4'
 'O'  'O'   0.0106   0.0060
 'International Tables Vol C Tables 4.2.6.8 and 6.1.1.4'
 'Cl'  'Cl'   0.1484   0.1585
 'International Tables Vol C Tables 4.2.6.8 and 6.1.1.4'
 'W'  'W'  -0.8490   6.8722
 'International Tables Vol C Tables 4.2.6.8 and 6.1.1.4'
 
_symmetry_cell_setting            'triclinic'
_symmetry_space_group_name_H-M    'P-1'
 
loop_
 _symmetry_equiv_pos_as_xyz
 'x, y, z'
 '-x, -y, -z'
 
_cell_length_a                    6.3690(10)
_cell_length_b                    8.574(2)
_cell_length_c                    10.985(2)
_cell_angle_alpha                 84.95(3)
_cell_angle_beta                  86.86(3)
_cell_angle_gamma                 88.86(3)
_cell_volume                      596.6(2)
_cell_formula_units_Z             2
_cell_measurement_temperature     133(2)
_cell_measurement_reflns_used     3588
_cell_measurement_theta_min       2.38
_cell_measurement_theta_max       27.54
 
_exptl_crystal_description        'blocks'
_exptl_crystal_colour             'colourless'
_exptl_crystal_size_max           0.20
_exptl_crystal_size_mid           0.20
_exptl_crystal_size_min           0.10
_exptl_crystal_density_meas       'not measured'
_exptl_crystal_density_diffrn     2.241
_exptl_crystal_density_method     'not measured'
_exptl_crystal_F_000              380
_exptl_absorpt_coefficient_mu     9.890
_exptl_absorpt_correction_type     multi-scan
_exptl_absorpt_correction_T_min   0.2424
_exptl_absorpt_correction_T_max   0.4379
_exptl_absorpt_process_details    ?
 
_exptl_special_details
;
'Intensities were measured with a Siemens CCD area detector'
;
 
_diffrn_ambient_temperature       133(2)
_diffrn_radiation_wavelength      0.71073
_diffrn_radiation_type            MoK\a
_diffrn_radiation_source          'fine-focus sealed tube'
_diffrn_radiation_monochromator   graphite
_diffrn_measurement_device_type   'Stoe-Siemens-Huber four circle diffractometer
_diffrn_measurement_method        'phi and omega scan'
_diffrn_detector_area_resol_mean  '8.192 pixels/mm'
_diffrn_standards_number          ?
_diffrn_standards_interval_count  ?
_diffrn_standards_interval_time   ?
_diffrn_standards_decay_%         ?
_diffrn_reflns_number             14359
_diffrn_reflns_av_R_equivalents   0.0759
_diffrn_reflns_av_sigmaI/netI     0.0561
_diffrn_reflns_limit_h_min        -8
_diffrn_reflns_limit_h_max        8
_diffrn_reflns_limit_k_min        -11
_diffrn_reflns_limit_k_max        11
_diffrn_reflns_limit_l_min        -14
_diffrn_reflns_limit_l_max        14
_diffrn_reflns_theta_min          2.38
_diffrn_reflns_theta_max          27.55
_reflns_number_total              2731
_reflns_number_gt                 2101
_reflns_threshold_expression      >2sigma(I)
 
_computing_data_collection        'Siemens SMART (V. 4.202, Siemens 1996)'
_computing_cell_refinement        'Siemens SAINT (V. 5.00, Siemens 1998)'
_computing_data_reduction         'Siemens SAINT (V. 5.00, Siemens 1998)'
_computing_structure_solution     'SHELXS-97 (Sheldrick, 1990)'
_computing_structure_refinement   'SHELXL-97 (Sheldrick, 1997)'
_computing_molecular_graphics     'Bruker AXS SHELXTL (V. 5.10)'
_computing_publication_material   'SHELXL-97 (Sheldrick, 1997)'
 
_refine_special_details
;
 Refinement of F^2^ against ALL reflections.  The weighted R-factor wR and
 goodness of fit S are based on F^2^, conventional R-factors R are based
 on F, with F set to zero for negative F^2^. The threshold expression of
 F^2^ > 2sigma(F^2^) is used only for calculating R-factors(gt) etc. and is
 not relevant to the choice of reflections for refinement.  R-factors based
 on F^2^ are statistically about twice as large as those based on F, and R-
 factors based on ALL data will be even larger.
;
 
_refine_ls_structure_factor_coef  Fsqd
_refine_ls_matrix_type            full
_refine_ls_weighting_scheme       calc
_refine_ls_weighting_details
 'calc w=1/[\s^2^(Fo^2^)+(0.0698P)^2^+0.0000P] where P=(Fo^2^+2Fc^2^)/3'
_atom_sites_solution_primary      direct
_atom_sites_solution_secondary    difmap
_atom_sites_solution_hydrogens    geom
_refine_ls_hydrogen_treatment     mixed
_refine_ls_extinction_method      none
_refine_ls_extinction_coef        ?
_refine_ls_number_reflns          2731
_refine_ls_number_parameters      168
_refine_ls_number_restraints      232
_refine_ls_R_factor_all           0.0619
_refine_ls_R_factor_gt            0.0433
_refine_ls_wR_factor_ref          0.1069
_refine_ls_wR_factor_gt           0.1003
_refine_ls_goodness_of_fit_ref    0.987
_refine_ls_restrained_S_all       0.965
_refine_ls_shift/su_max           0.000
_refine_ls_shift/su_mean          0.000
 
loop_
 _atom_site_label
 _atom_site_type_symbol
 _atom_site_fract_x
 _atom_site_fract_y
 _atom_site_fract_z
 _atom_site_U_iso_or_equiv
 _atom_site_adp_type
 _atom_site_occupancy
 _atom_site_symmetry_multiplicity
 _atom_site_calc_flag
 _atom_site_refinement_flags
 _atom_site_disorder_assembly
 _atom_site_disorder_group
Cl1 Cl -0.7112(8) 0.6149(7) 0.1641(5) 0.0383(12) Uani 0.55 1 d PDU A 1
O2 O -0.7870(15) 0.9325(13) 0.2157(9) 0.032(2) Uani 0.55 1 d PDU A 1
O3 O -0.6416(18) 1.0163(13) 0.2867(11) 0.027(2) Uani 0.55 1 d PDU A 1
Cl1' Cl -0.7154(9) 1.0095(7) 0.2504(5) 0.0310(11) Uani 0.45 1 d PDU A 2
O2' O -0.7807(18) 0.7111(19) 0.1664(12) 0.038(3) Uani 0.45 1 d PDU A 2
O3' O -0.634(3) 0.5764(18) 0.1910(16) 0.039(3) Uani 0.45 1 d PDU A 2
W1 W -0.56923(5) 0.77939(5) 0.27901(3) 0.03390(14) Uani 1 1 d DU . .
O1 O -0.6553(9) 0.7115(6) 0.4231(5) 0.0314(11) Uani 1 1 d U A .
C1 C -0.2427(11) 0.6415(8) 0.2626(7) 0.0278(13) Uani 1 1 d DU A .
C2 C -0.2328(9) 0.7317(9) 0.3629(6) 0.0252(13) Uani 1 1 d DU A .
C3 C -0.2437(10) 0.8922(8) 0.3154(6) 0.0210(12) Uani 1 1 d DU A .
C4 C -0.2497(11) 0.8995(8) 0.1821(6) 0.0236(13) Uani 1 1 d DU A .
C5 C -0.2487(11) 0.7478(9) 0.1526(7) 0.0243(13) Uani 1 1 d DU A .
C11 C -0.2316(15) 0.4658(9) 0.2670(9) 0.041(2) Uani 1 1 d DU . .
H11A H -0.0868 0.4322 0.2471 0.062 Uiso 1 1 calc R A .
H11B H -0.3248 0.4297 0.2076 0.062 Uiso 1 1 calc R . .
H11C H -0.2759 0.4211 0.3494 0.062 Uiso 1 1 calc R . .
C12 C -0.2101(12) 0.6738(9) 0.4939(6) 0.0277(16) Uani 1 1 d DU . .
H12A H -0.0605 0.6620 0.5100 0.042 Uiso 1 1 calc R A .
H12B H -0.2787 0.5723 0.5110 0.042 Uiso 1 1 calc R . .
H12C H -0.2762 0.7492 0.5468 0.042 Uiso 1 1 calc R . .
C13 C -0.2331(13) 1.0325(9) 0.3867(7) 0.0332(17) Uani 1 1 d DU . .
H13A H -0.2536 1.0002 0.4743 0.050 Uiso 1 1 calc R A .
H13B H -0.3436 1.1081 0.3621 0.050 Uiso 1 1 calc R . .
H13C H -0.0953 1.0811 0.3705 0.050 Uiso 1 1 calc R . .
C14 C -0.2493(12) 1.0486(9) 0.1007(7) 0.0300(16) Uani 1 1 d DU . .
H14A H -0.1111 1.0971 0.0998 0.045 Uiso 1 1 calc R A .
H14B H -0.3574 1.1203 0.1314 0.045 Uiso 1 1 calc R . .
H14C H -0.2791 1.0262 0.0174 0.045 Uiso 1 1 calc R . .
C15 C -0.2459(13) 0.6905(10) 0.0243(7) 0.0335(18) Uani 1 1 d DU . .
H15A H -0.2771 0.7786 -0.0353 0.050 Uiso 1 1 calc R A .
H15B H -0.3522 0.6098 0.0225 0.050 Uiso 1 1 calc R . .
H15C H -0.1067 0.6465 0.0036 0.050 Uiso 1 1 calc R . .
 
loop_
 _atom_site_aniso_label
 _atom_site_aniso_U_11
 _atom_site_aniso_U_22
 _atom_site_aniso_U_33
 _atom_site_aniso_U_23
 _atom_site_aniso_U_13
 _atom_site_aniso_U_12
Cl1 0.025(2) 0.055(3) 0.039(3) -0.026(2) -0.0002(19) -0.013(2)
O2 0.016(4) 0.049(6) 0.031(5) -0.005(4) -0.011(4) 0.001(4)
O3 0.022(5) 0.038(4) 0.022(6) -0.004(4) -0.011(4) 0.004(4)
Cl1' 0.025(3) 0.040(3) 0.028(3) 0.001(2) -0.002(2) 0.008(2)
O2' 0.010(4) 0.064(8) 0.042(6) -0.009(7) 0.002(4) 0.002(5)
O3' 0.024(7) 0.054(7) 0.039(8) -0.009(7) -0.006(6) -0.007(5)
W1 0.01510(17) 0.0615(3) 0.02308(18) 0.00808(14) -0.00067(11) -0.00312(13)
O1 0.030(3) 0.034(3) 0.029(3) 0.001(2) 0.000(2) -0.001(2)
C1 0.022(3) 0.031(3) 0.032(3) -0.007(3) -0.003(3) -0.002(3)
C2 0.020(3) 0.030(3) 0.026(3) -0.005(3) -0.005(3) 0.003(3)
C3 0.016(3) 0.026(3) 0.021(3) -0.002(2) 0.000(2) 0.002(2)
C4 0.018(3) 0.033(3) 0.020(3) -0.004(2) 0.001(2) -0.002(3)
C5 0.016(3) 0.028(3) 0.030(3) -0.007(3) -0.001(2) -0.007(3)
C11 0.053(6) 0.030(4) 0.042(5) -0.008(3) -0.005(4) -0.002(4)
C12 0.025(4) 0.031(4) 0.027(3) 0.002(3) -0.006(3) 0.004(3)
C13 0.039(5) 0.033(4) 0.028(4) -0.005(3) -0.003(3) -0.001(4)
C14 0.025(4) 0.037(4) 0.026(4) 0.008(3) -0.002(3) 0.001(3)
C15 0.034(4) 0.042(5) 0.025(3) -0.011(3) -0.002(3) 0.008(4)
 
_geom_special_details
;
 All esds (except the esd in the dihedral angle between two l.s. planes)
 are estimated using the full covariance matrix.  The cell esds are taken
 into account individually in the estimation of esds in distances, angles
 and torsion angles; correlations between esds in cell parameters are only
 used when they are defined by crystal symmetry.  An approximate (isotropic)
 treatment of cell esds is used for estimating esds involving l.s. planes.
;
 
loop_
 _geom_bond_atom_site_label_1
 _geom_bond_atom_site_label_2
 _geom_bond_distance
 _geom_bond_site_symmetry_2
 _geom_bond_publ_flag
Cl1 W1 2.211(4) . ?
O2 O3 1.478(12) . ?
O2 W1 2.000(9) . ?
O3 W1 2.082(11) . ?
Cl1' W1 2.170(5) . ?
O2' O3' 1.488(16) . ?
O2' W1 2.007(11) . ?
O3' W1 2.121(14) . ?
W1 O1 1.703(5) . ?
W1 C3 2.373(6) . ?
W1 C1 2.378(7) . ?
W1 C2 2.392(6) . ?
W1 C5 2.430(7) . ?
W1 C4 2.448(7) . ?
C1 C2 1.405(10) . ?
C1 C5 1.449(11) . ?
C1 C11 1.503(10) . ?
C2 C3 1.430(11) . ?
C2 C12 1.495(9) . ?
C3 C4 1.463(9) . ?
C3 C13 1.497(9) . ?
C4 C5 1.368(10) . ?
C4 C14 1.494(9) . ?
C5 C15 1.532(9) . ?
 
loop_
 _geom_angle_atom_site_label_1
 _geom_angle_atom_site_label_2
 _geom_angle_atom_site_label_3
 _geom_angle
 _geom_angle_site_symmetry_1
 _geom_angle_site_symmetry_3
 _geom_angle_publ_flag
O3 O2 W1 71.8(6) . . ?
O2 O3 W1 65.8(5) . . ?
O3' O2' W1 73.0(7) . . ?
O2' O3' W1 64.8(7) . . ?
O1 W1 O2 106.8(4) . . ?
O1 W1 O2' 106.2(4) . . ?
O2 W1 O2' 60.5(6) . . ?
O1 W1 O3 99.4(4) . . ?
O2 W1 O3 42.4(4) . . ?
O2' W1 O3 102.7(5) . . ?
O1 W1 O3' 97.4(5) . . ?
O2 W1 O3' 102.5(5) . . ?
O2' W1 O3' 42.1(5) . . ?
O3 W1 O3' 144.4(6) . . ?
O1 W1 Cl1' 104.5(2) . . ?
O2 W1 Cl1' 25.3(3) . . ?
O2' W1 Cl1' 85.6(5) . . ?
O3 W1 Cl1' 17.1(2) . . ?
O3' W1 Cl1' 127.4(5) . . ?
O1 W1 Cl1 102.7(2) . . ?
O2 W1 Cl1 85.2(4) . . ?
O2' W1 Cl1 24.9(4) . . ?
O3 W1 Cl1 127.2(4) . . ?
O3' W1 Cl1 17.3(4) . . ?
Cl1' W1 Cl1 110.2(2) . . ?
O1 W1 C3 101.7(2) . . ?
O2 W1 C3 114.6(4) . . ?
O2' W1 C3 151.8(4) . . ?
O3 W1 C3 76.0(4) . . ?
O3' W1 C3 130.4(5) . . ?
Cl1' W1 C3 91.1(2) . . ?
Cl1 W1 C3 142.1(2) . . ?
O1 W1 C1 100.2(3) . . ?
O2 W1 C1 153.0(4) . . ?
O2' W1 C1 113.0(5) . . ?
O3 W1 C1 131.9(4) . . ?
O3' W1 C1 74.6(5) . . ?
Cl1' W1 C1 143.2(2) . . ?
Cl1 W1 C1 90.0(2) . . ?
C3 W1 C1 57.2(2) . . ?
O1 W1 C2 82.2(2) . . ?
O2 W1 C2 149.0(4) . . ?
O2' W1 C2 146.8(5) . . ?
O3 W1 C2 107.6(4) . . ?
O3' W1 C2 105.7(5) . . ?
Cl1' W1 C2 124.1(3) . . ?
Cl1 W1 C2 122.5(2) . . ?
C3 W1 C2 34.9(3) . . ?
C1 W1 C2 34.3(2) . . ?
O1 W1 C5 135.0(3) . . ?
O2 W1 C5 117.9(4) . . ?
O2' W1 C5 99.7(4) . . ?
O3 W1 C5 110.0(4) . . ?
O3' W1 C5 78.1(5) . . ?
Cl1' W1 C5 113.6(2) . . ?
Cl1 W1 C5 86.1(2) . . ?
C3 W1 C5 56.3(2) . . ?
C1 W1 C5 35.1(3) . . ?
C2 W1 C5 57.2(2) . . ?
O1 W1 C4 136.6(2) . . ?
O2 W1 C4 100.4(4) . . ?
O2' W1 C4 116.5(4) . . ?
O3 W1 C4 78.8(4) . . ?
O3' W1 C4 109.0(5) . . ?
Cl1' W1 C4 86.3(2) . . ?
Cl1 W1 C4 112.8(2) . . ?
C3 W1 C4 35.3(2) . . ?
C1 W1 C4 57.2(2) . . ?
C2 W1 C4 58.2(2) . . ?
C5 W1 C4 32.6(2) . . ?
C2 C1 C5 108.0(6) . . ?
C2 C1 C11 126.1(7) . . ?
C5 C1 C11 125.8(7) . . ?
C2 C1 W1 73.4(4) . . ?
C5 C1 W1 74.4(4) . . ?
C11 C1 W1 121.7(5) . . ?
C1 C2 C3 106.7(6) . . ?
C1 C2 C12 127.5(7) . . ?
C3 C2 C12 125.8(6) . . ?
C1 C2 W1 72.3(4) . . ?
C3 C2 W1 71.8(3) . . ?
C12 C2 W1 122.1(4) . . ?
C2 C3 C4 108.9(6) . . ?
C2 C3 C13 126.6(6) . . ?
C4 C3 C13 124.3(7) . . ?
C2 C3 W1 73.3(3) . . ?
C4 C3 W1 75.1(4) . . ?
C13 C3 W1 121.7(5) . . ?
C5 C4 C3 106.2(6) . . ?
C5 C4 C14 129.8(7) . . ?
C3 C4 C14 123.9(6) . . ?
C5 C4 W1 73.0(4) . . ?
C3 C4 W1 69.6(4) . . ?
C14 C4 W1 123.6(5) . . ?
C4 C5 C1 110.1(6) . . ?
C4 C5 C15 127.3(7) . . ?
C1 C5 C15 122.6(7) . . ?
C4 C5 W1 74.4(4) . . ?
C1 C5 W1 70.5(4) . . ?
C15 C5 W1 123.2(5) . . ?
 
_diffrn_measured_fraction_theta_max    0.991
_diffrn_reflns_theta_full              27.55
_diffrn_measured_fraction_theta_full   0.991
_refine_diff_density_max    2.608
_refine_diff_density_min   -3.587
_refine_diff_density_rms    0.268
